# Supplementary material for: A robust and renewable solar steam generator for high concentration dye wastewater purification
Source: Royal Society of Chemistry journal article supplement (doi:10.1039/d1ta10251f), 2022-01-01
Supplement: d1ta10251f1.pdf [file d1ta10251f1.pdf]

## Supporting Information

### A robust and renewable solar steam generator for high concentration dye wastewater purification

Xuan Wang, Kang Liu, Zubin Wang, Liping Heng,\* and Lei Jiang

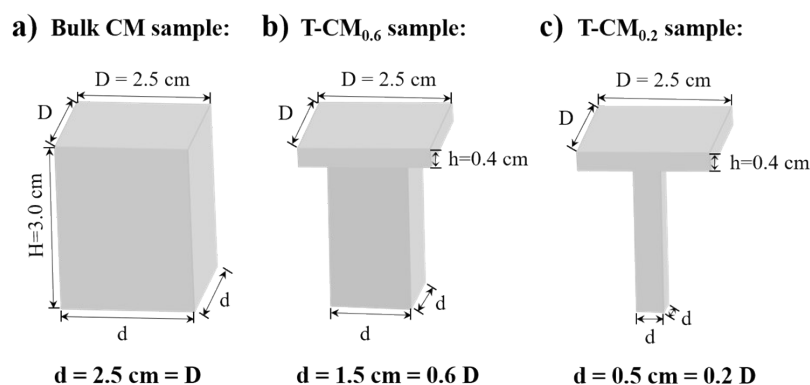

**Figure S1.** The schematic of a) bulk CM, b) T-CM<sub>0.6</sub> and c) T-CM<sub>0.2</sub> samples.

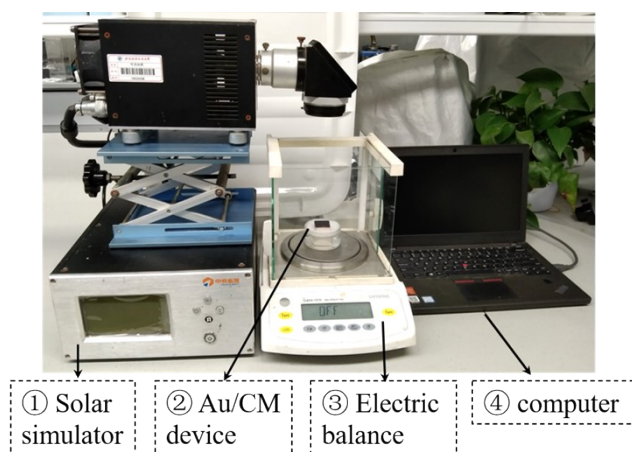

**Figure S2.** The setup diagram of solar steam generating system.

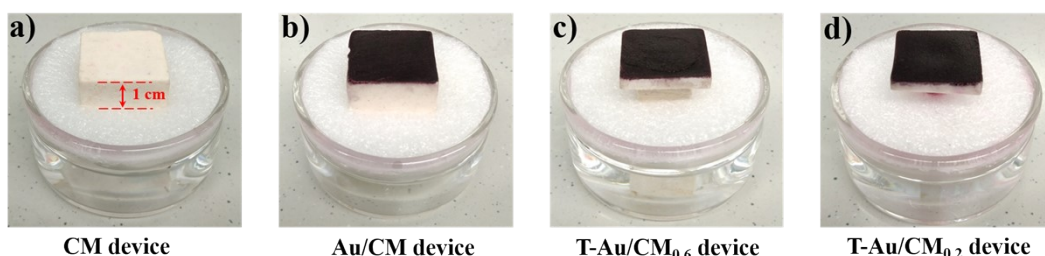

**Figure S3.** Photos of different evaporation devices including a) CM-only, b) bulk Au/CM, c) T-Au/CM<sub>0.6</sub> and d) T-Au/CM<sub>0.2</sub> devices.

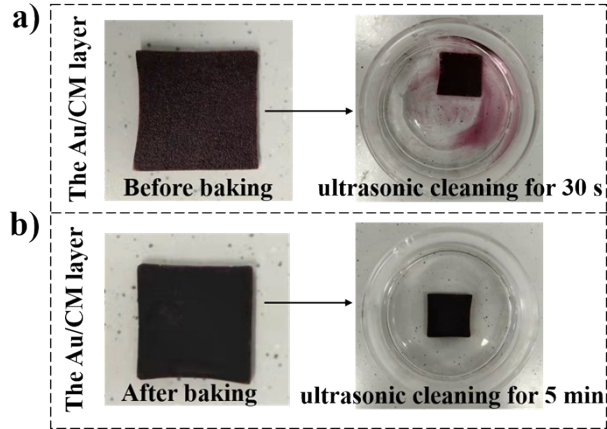

**Figure S4.** a) The Au/CM layer before baking are too incompact to resist the ultrasonic cleaning within 30s. b) In contrast, the prepared Au/CM layer after baking can keep its integrity even be ultrasonic cleaned for 5 min. To clearly observe the effect of ultrasonic cleaning, the Au nanoparticles were deposited on a thin CM layer with a 3 mm thickness.

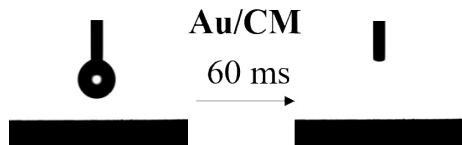

**Figure S5.** Images of dynamic water contact angle on the upper surface of Au/CM layer, exhibiting the Au/CM surface also possesses good superhydrophily.

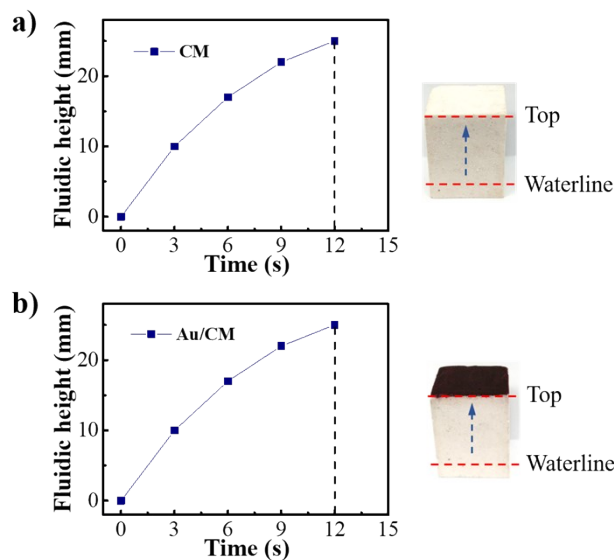

**Figure S6.** The water transportation capacity from waterline to the top surface (the direction of blue arrow) for a) bulk CM and b) Au/CM samples, when their bottom was immersed in water for 5 mm depth.

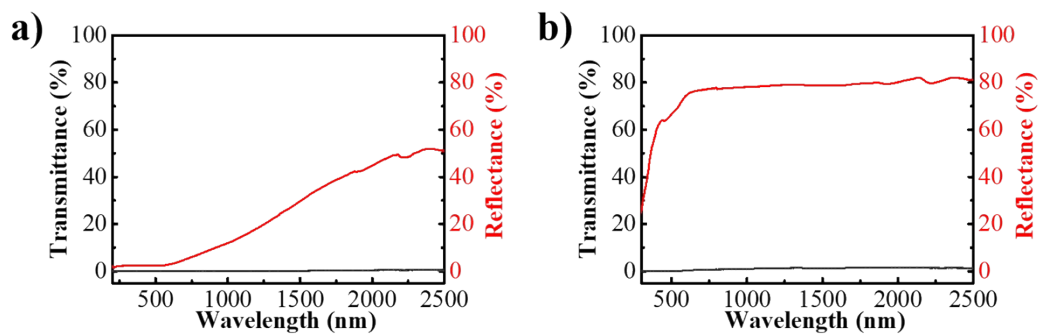

**Figure S7.** The transmittance and reflectance spectra of (a) Au/CM layer and (b) CM layer.

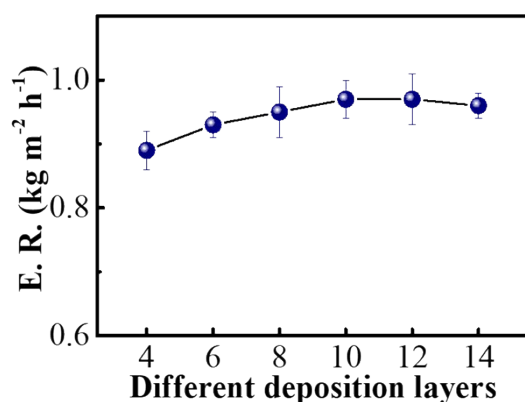

**Figure S8.** The influence of different Au nanoparticles deposition layers on the evaporation rate.

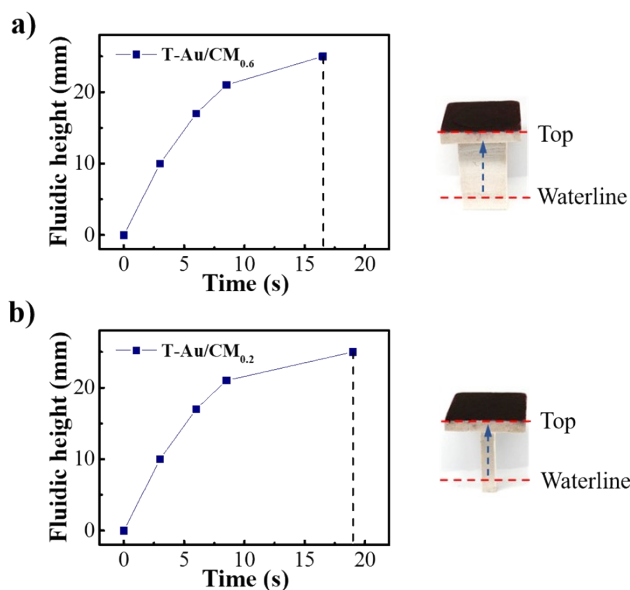

**Figure S9.** The water transportation capacity from waterline to the top surface (the direction of blue arrow) for a) T-Au/CM<sub>0.6</sub> and b) T-Au/CM<sub>0.2</sub> samples, when their bottom was immersed in water for 5 mm depth.

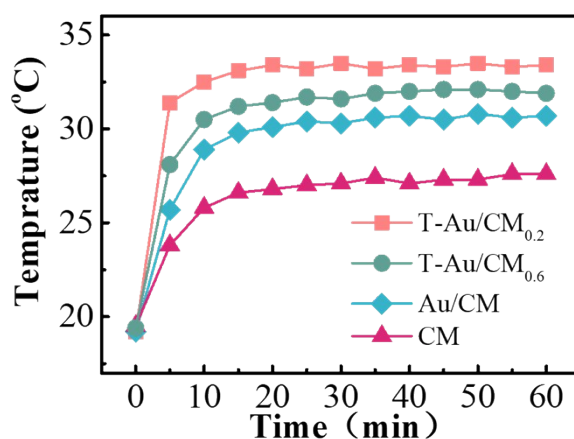

**Figure S10.** Surface temperature changes of four kinds of solar evaporation devices with increasing time in water evaporation process under 1-sunlight irradiation.

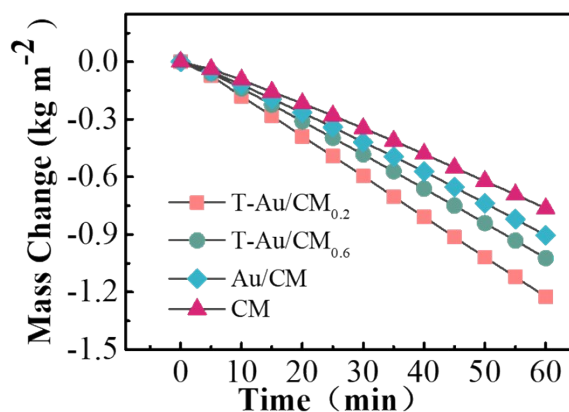

**Figure S11.** Comparison of the water mass change with time for different evaporation systems including CM-only, bulk Au/CM, T-Au/CM<sub>0.6</sub> and T-Au/CM<sub>0.2</sub> devices under 1-sunlight irradiation, respectively.

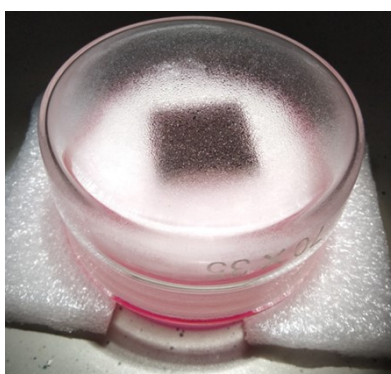

**Figure S12.** The condensation and collection of steam generated from T-Au/CM<sub>0.2</sub> device under solar irradiation.

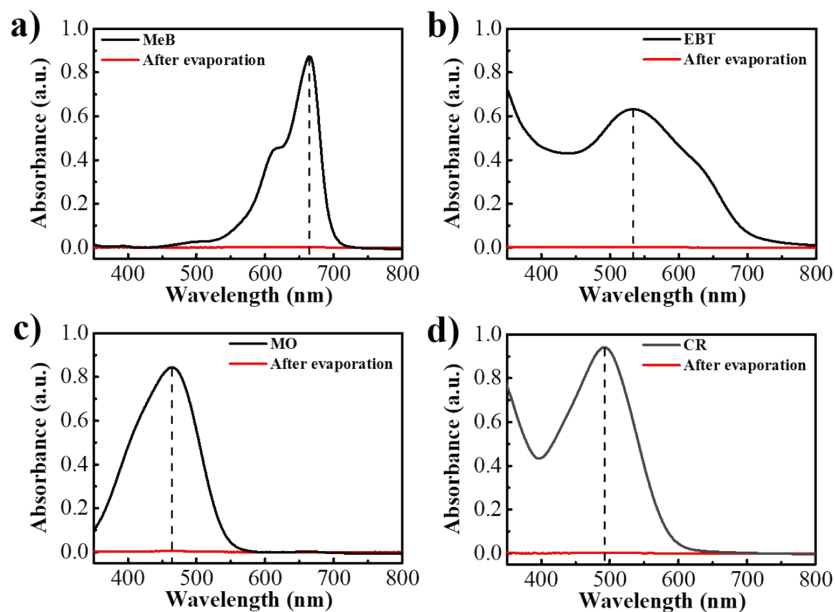

**Figure S13.** Absorption spectra of (a) MeB, (b) EBT, (c) MO and (d) CR reference solutions (black line), and corresponding condensed water after evaporation of T-Au/CM<sub>0.2</sub> device (red line).

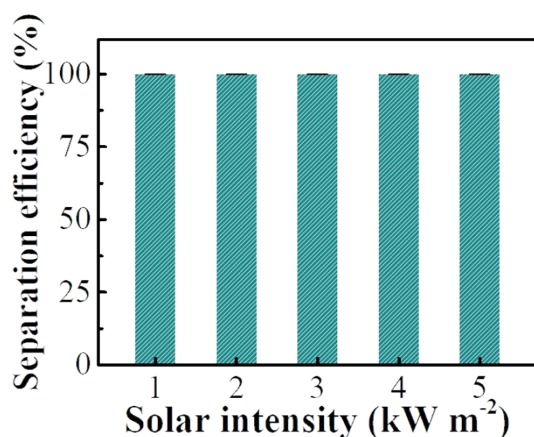

**Figure S14.** The separation efficiency of T-Au/CM<sub>0.2</sub> device in separating 1 mg mL<sup>-1</sup> RhB wastewater, under different solar irradiation intensity.

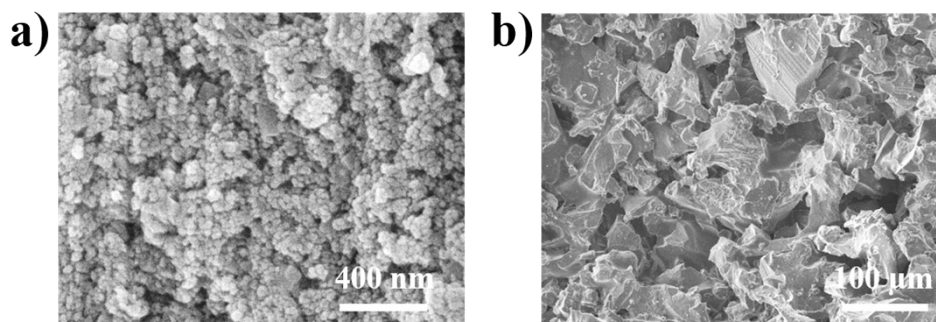

**Figure S15.** (a) The magnified SEM image of the upper Au layer after a 2 hours calcination at 600 °C. (b) The SEM image of the lateral CM layer after a 2 hours calcination at 600 °C.

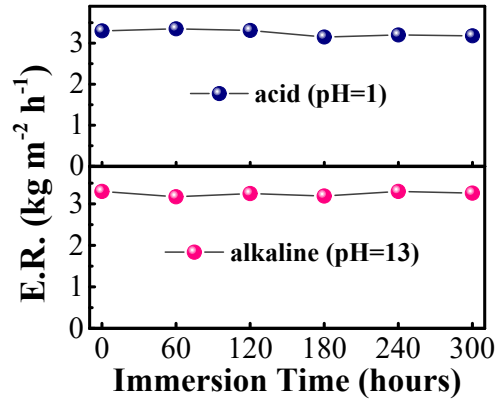

**Figure S16.** The evaporation rate changes of T-Au/CM<sub>0.2</sub> device under 1-sunlight and 1 m s<sup>-1</sup> wind, after immersed in acid solution (pH=1) or alkaline solution (pH=13) for 300 hours.

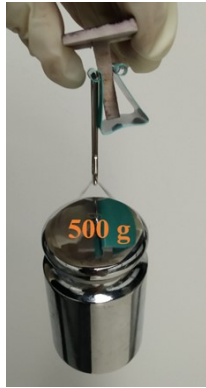

**Figure S17.** The T-Au/CM<sub>0.2</sub> sample withstanding a 500 g weight.

### The calculation of solar evaporation efficiency:

Here, we calculate the corresponding solar evaporation efficiency ( $\eta_{ev}$ ) for the devices in our work by the following expression:<sup>1</sup>

$$\eta_{ev} = \frac{m(H_{LV} + Q)}{E_{in}} \quad (1)$$

$$H_{LV(T)} = 1.91846 \times 10^3 (T_1 - 33.91)^2 \quad (2)$$

$$Q = c(T_1 - T_0) \quad (3)$$

where  $m$  is the water evaporation rate under sunlight irradiation ( $\text{kg m}^{-2} \text{h}^{-1}$ ),  $H_{LV}$  is the enthalpy of vaporization for water ( $\text{kJ kg}^{-1}$ ),  $Q$  is the absorbed heat for water temperature increase ( $\text{kJ kg}^{-1}$ ),  $E_{in}$  is the energy input of the incident sunlight ( $\text{kJ m}^{-2} \text{h}^{-1}$ ),  $c$  is the specific heat capacity of water ( $4.2 \text{ kJ kg}^{-1} \text{K}^{-1}$ ),  $T_1$  is the temperature of evaporation interface (K), and  $T_0$  is the original temperature of water (K). And the calculation of  $\eta_{ev}$  was exhibited in the following Table S1.

**Table S1.** The calculation of  $\eta_{ev}$  for different Au/CM devices.

| Devices                | $m$<br>( $\text{kg m}^{-2} \text{h}^{-1}$ ) | $T_1$<br>(K) | $T_0$<br>(K) | $E_{in}$<br>( $\text{kJ m}^{-2} \text{h}^{-1}$ ) | $\eta_{ev}$ |
|------------------------|---------------------------------------------|--------------|--------------|--------------------------------------------------|-------------|
| bulk Au/CM             | 0.97                                        | 303.25       | 292.45       | 3600<br>(1-sunlight<br>intensity)                | 66.7%       |
| T-Au/CM <sub>0.6</sub> | 1.08                                        | 304.55       |              |                                                  | 74.4%       |

|                        |      |        |  |  |       |
|------------------------|------|--------|--|--|-------|
| T-Au/CM <sub>0.2</sub> | 1.26 | 306.55 |  |  | 87.0% |
|------------------------|------|--------|--|--|-------|

**Table S2.** The detail values for the separation efficiency calculation of RhB wastewater with different concentration.

| $C_0$ (mg mL <sup>-1</sup> ) | $C_r$ (mg mL <sup>-1</sup> ) | $A_r$ (a. u.) | $A_p$ (a. u.) | $\frac{C_r A_p}{C_p = A_r}$ | $\eta = \frac{C_0 - C_p}{C_0} \quad *$<br>100% |
|------------------------------|------------------------------|---------------|---------------|-----------------------------|------------------------------------------------|
| 0.01 (RhB)                   | 0.004 (RhB)                  | 0.696         | 0.00344       | 0.00002                     | 99.80%                                         |
| 0.1 (RhB)                    |                              |               | 0.00382       | 0.00002                     | 99.98%                                         |
| 1 (RhB)                      |                              |               | 0.00521       | 0.00003                     | ~ 100.00%                                      |
| 10 (RhB)                     |                              |               | 0.00432       | 0.00002                     | ~ 100.00%                                      |

**Table S3.** The detail values for the separation efficiency calculation of different types dye wastewater.

| $C_0$ (mg mL <sup>-1</sup> ) | $C_r$ (mg mL <sup>-1</sup> ) | $A_r$ (a. u.) | $A_p$ (a. u.) | $\frac{C_r A_p}{C_p = A_r}$ | $\eta = \frac{C_0 - C_p}{C_0} \quad *$<br>100% |
|------------------------------|------------------------------|---------------|---------------|-----------------------------|------------------------------------------------|
| 1 (MeB)                      | 0.01 (MeB)                   | 0.873         | 0.00220       | 0.00003                     | ~100.00%                                       |
| 1 (EBT)                      | 0.04 (EBT)                   | 0.632         | 0.00132       | 0.00008                     | 99.99%                                         |
| 1 (MO)                       | 0.01 (MO)                    | 0.844         | 0.00403       | 0.00005                     | ~100.00%                                       |
| 1 (CR)                       | 0.02 (CR)                    | 0.941         | 0.00131       | 0.00003                     | ~100.00%                                       |

## Reference

1 X. Wu, Z. Q. Wu, Y. D. Wang, T. Gao, Q. Li and H. L. Xu, *Adv. Sci.*, 2021, **8**, 2002501.
